# Supplementary material for: Early risk predictors of acute kidney injury and short-term survival during Impella support in cardiogenic shock
Source: PubMed Central journal article supplement (PMC11289486; doi:10.1038/s41598-024-68376-w), 2024-07-30
Supplement: 41598_2024_68376_MOESM1_ESM.pdf [file 41598_2024_68376_MOESM1_ESM.pdf]

**Suppl. Table 1. SCAI classification and data about PCI strategy of the overall cohort**

|                             |                                                                                                                                     |
|-----------------------------|-------------------------------------------------------------------------------------------------------------------------------------|
| SCAI classification         | A: n=0 (0%)<br>B: n=0 (0%)<br>C: n=50 (100%)<br>D: n=0 (0%)<br>E: n=0(0%)                                                           |
| Cardiac arrest              | n=0 (0%)                                                                                                                            |
| Culprit lesion intervention | n=50 (100%)                                                                                                                         |
| Vessels intervened          | LMCA: n= 4 (8%)<br>LAD: n=19 (38%)<br>LAD/RD1: n=6 (12%)<br>LAD/RD2: n=4 (8%)<br>LCX: n=8 (16%)<br>RIM: n=6 (12%)<br>RPLD: n=3 (6%) |

Abbreviations: SCAI: Society for Cardiovascular Angiography and Interventions, LMCA: left main coronary artery, LAD: left anterior descending, RD1: diagonal branch 1, RD2: diagonal branch 2, LCX: left circumflex artery, RIM: intermediary branch, RPLD: right posterolateral branch.
